# Supplementary material for: Newborn Genomic Screening Detects Chromosomal Aneuploidies
Source: Research Square preprint supplement (doi:10.21203/rs.3.rs-4880901/v1), 2024-09-26
Supplement: Supplementary file 1 [file 14c28877ea21382b5aa80a9f.docx]

Table S1 Prenatal screening information in follow-up data of aneuploidy cases

| # | Aneuploidy | Follow-up cases | Confirmatory test | Prenatal examination | | | | |  | Neonatal phenotypes |
| --- | --- | --- | --- | --- | --- | --- | --- | --- | --- | --- |
| NT | MSS | NIPT | | Ultrasound |  |
| 1 | T21 | 3/3 | T21 | √ | √ | | T21 | Atrioventricular septal defect, loss of nasal bone. |  | Down syndrome phenotype |
| 2 | T21 | √ | √ | | - | √ |  | Down syndrome phenotype |
| 3 | T21 | √ | √ | | - | √ |  | Down syndrome phenotype |
| 4 | XO | 4/9 | mosaic  X0 | √ | √ | | - | √ |  | Tachypnea, neonatal pneumonia, pathological jaundice |
| 5 | X0 | √ | √ | | - | Short femur length（<-2SD,28W+ and 32W+） |  | Low birth weight,  edema of both feet |
| 6 | mosaic X0 a | √ | fhCGβ MoM value increased | | X0 | Fetal smallness, short femur length（33W+） |  | Low birth weight |
| 7 | mosaic X0 a | √ | High risk on T21 | | mosaic X0 | √ |  | √ |
| 8 | XXY | 15/21 | XXY | √ | √ | | - | Oligohydramnios |  | √ |
| 9 | XXY | √ | fhCGβ MoM value decreased | | - | Right subclavian vagal artery（25W+） |  | √ |
| 10 | XXY | Increased | Close to high risk on T21 | | - | √ |  | √ |
| 11 | XXY | √ | √ | | - | √ |  | Cryptorchidism |
| 12-22 | XXY/XXYY | √ / - | √ / - | | - | √ / - |  | √ |
| 23 | XXX | 3/8 | XXX a | √ | - | | XXX | Ventricular septal muscle defect |  | √ |
| 24 | XXX a | Increased | √ | | XXX | √ |  | √ |
| 25 | XXX a | √ | √ | | XXX | √ |  | √ |
| 26 | XYY | 5/6 | XYY a | √ | √ | | XYY | √ |  | √ |
| 27 | XYY a | √ | √ | | XYY | √ |  | √ |
| 28 | XYY a | Increased | √ | | - | √ |  | √ |
| 29 | XYY a | √ | fhCGβ MoM value decreased | | XXY | Polyhydramnios |  | √ |
| 30 | XYY | √ | √ | | - | √ |  | √ |

Note: The symbol "√" indicates that the corresponding result was in normal range, while "-" indicates that the test was not performed. The superscript 'a' denotes that aneuploidy was determined by invasive prenatal testing. NT, nuchal translucency. MSS, maternal serum screening. NIPT, non-invasive prenatal testing.
