# Supplementary material for: Newborn Genomic Screening Detects Chromosomal Aneuploidies
Source: Research Square preprint supplement (doi:10.21203/rs.3.rs-4880901/v1), 2024-09-26
Supplement: Supplementary file 2 [file f5ebb08f1076d53f39e3774a.docx]

Table S2 NBS panel mosaic detection results and verification comparison

| NO. | NBS panel | Verification | Chimeric rates (%) |
| --- | --- | --- | --- |
| 1 | XO | mos 45,X[44]/46,X,r(X)[6] | 88 |
| 2 | XO | mos46,X,+mar2[65]/46,X,+mar1[30]/47,X,+mar2x2[3]/47,X,+mar1,+mar2[2] | XX？ |
| 3 | XO | mos 45,X[75]/46,XX[25] | 75 |
| 4 | XXY | 46,XY[30]/47,XXY[20] | 40 |
